# Supplementary material for: A laboratory heterodyne emission spectrometer at submillimeter wavelengths
Source: Royal Society of Chemistry journal article supplement (doi:10.1039/c7cp06394f), 2017-11-01
Supplement: c7cp06394f1.pdf [file c7cp06394f1.pdf]

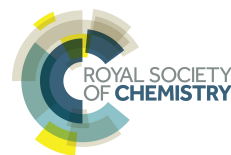

# Journal Name

ARTICLE TYPE

## 1 Supplementary Material

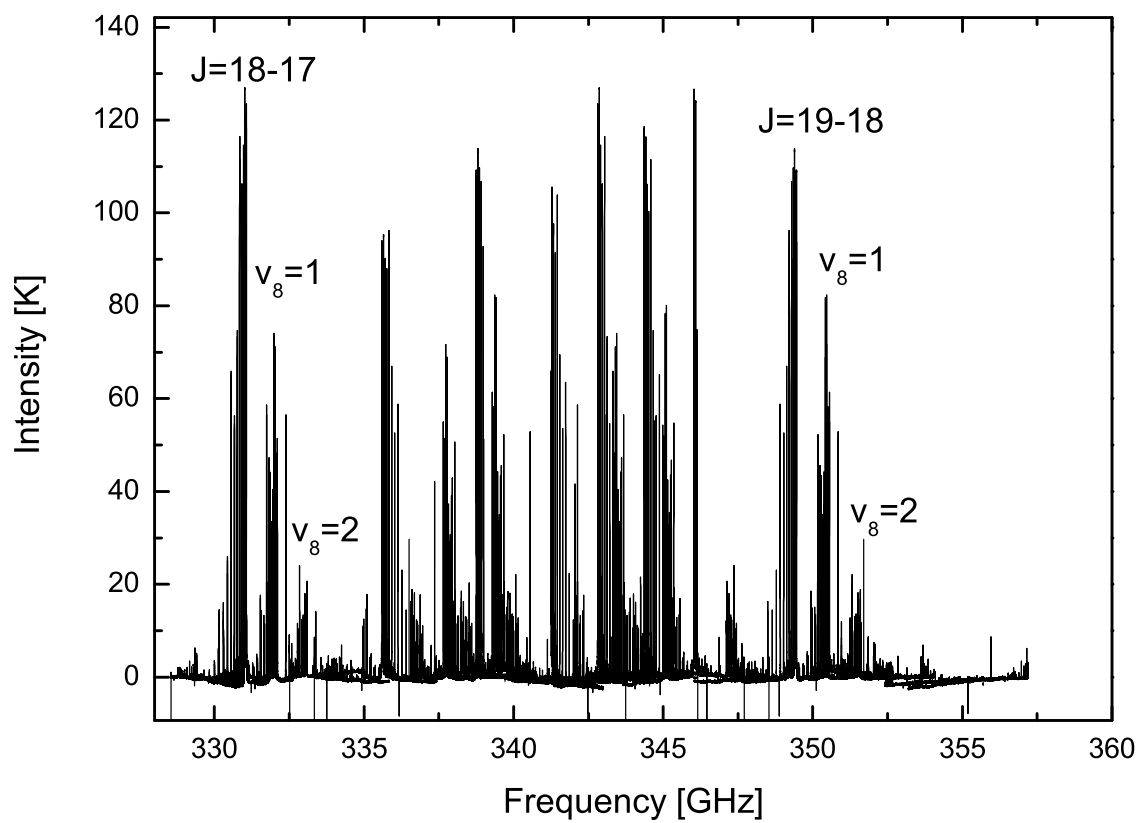

**Fig. 1** Unbiased spectral line survey of methyl cyanide (CH<sub>3</sub>CN). The DSB spectrum is shown. Frequencies are given in GHz and the intensity is calibrated to Kelvin (DSB). The laboratory survey coincides with the ALMA Band 7 PILS survey (see Reference 20 in the main article).

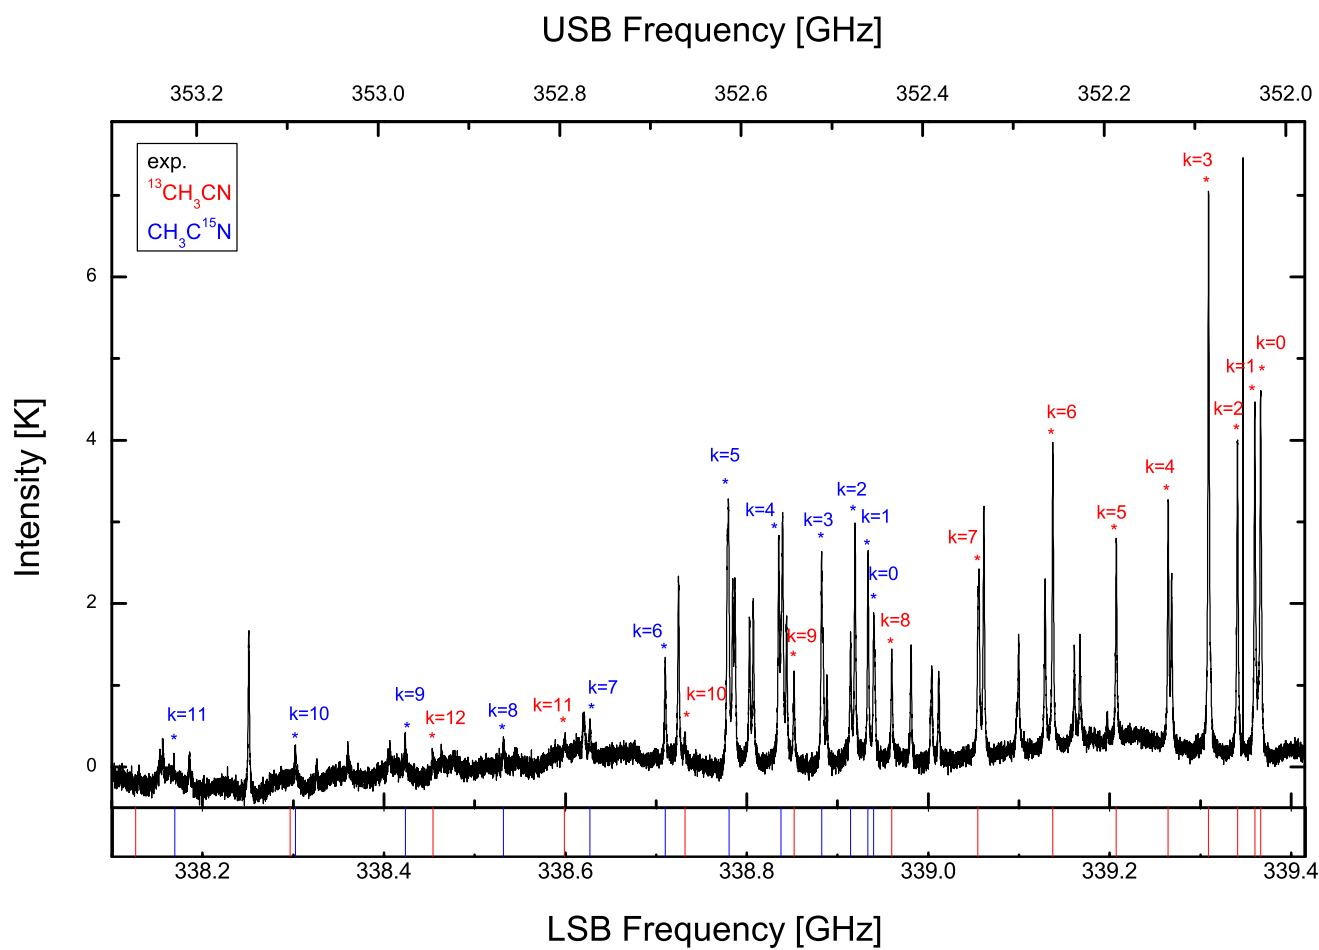

**Fig. 2** The  $^{13}\text{CH}_3\text{CN}$  and  $\text{CH}_3\text{C}^{15}\text{N}$  isotopes are shown. The black line shows the experimental emission spectrum. In red and blue a stick diagram is shown giving the frequencies of the isotopologues. Here, red indicates the position of the  $^{13}\text{C}$  isotopologue, and blue is indicative of the  $^{15}\text{N}$  isotopologue. The spectrum has been recorded integrating 300 s on the molecular signal at pressures of around  $1 \times 10^{-2}$  mbar. The intensities are calibrated to Kelvin (DSB). The absolute noise is around 0.05 K.

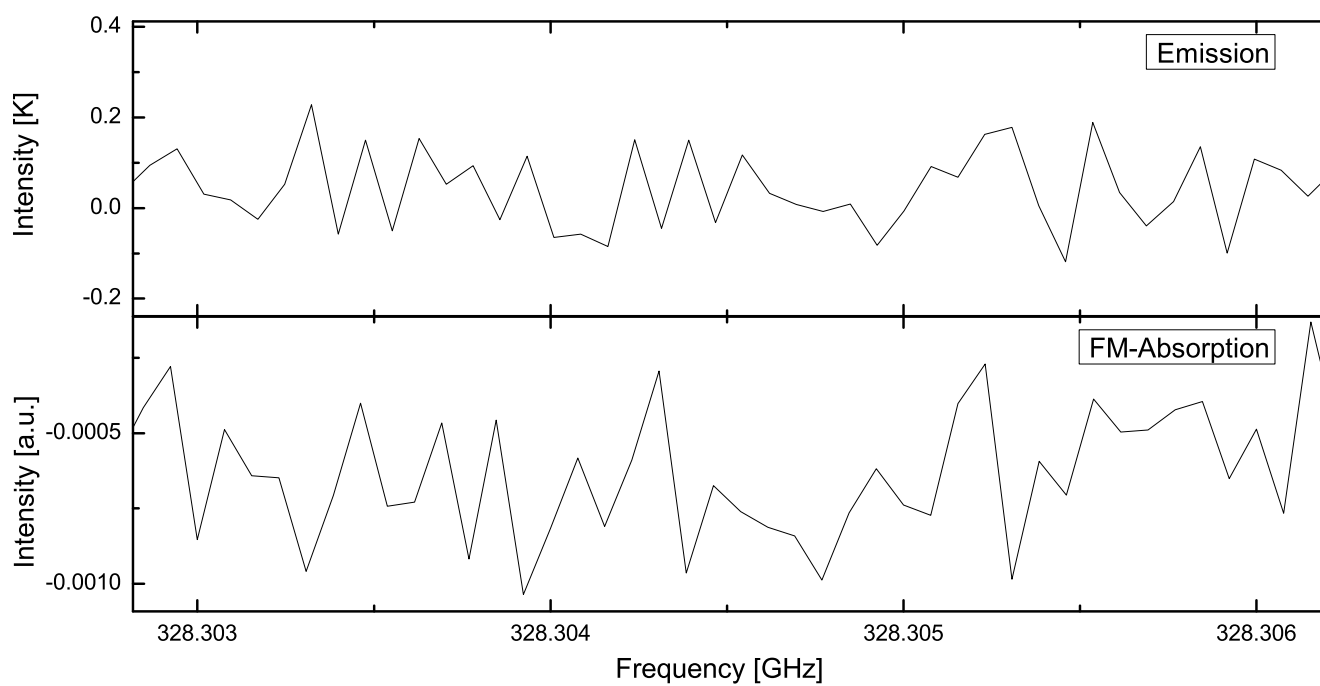

**Fig. 3** The baseline of a 300 second integration using the emission spectrometer is shown in the upper panel. Lower panel: The baseline of the FM-absorption experiment is shown after correcting for the difference in integration time between the two distinct spectroscopic techniques.
